# Supplementary material
Source: PubMed Central journal article supplement (PMC9461376)
Supplement: mmc2.pdf [file mmc2.pdf]

# Supplementary figure 1

(a) England and Wales

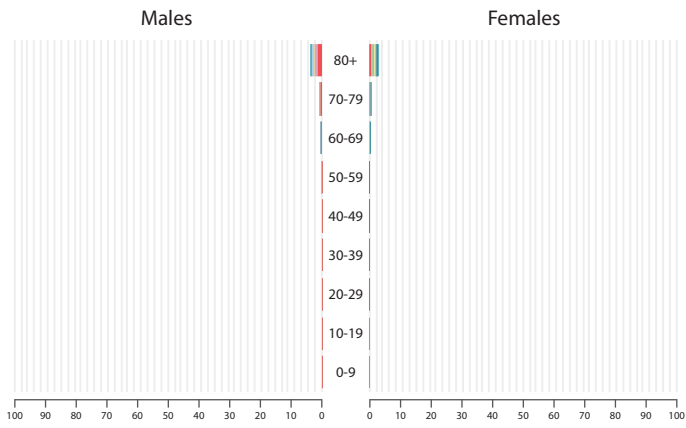

(b) Italy

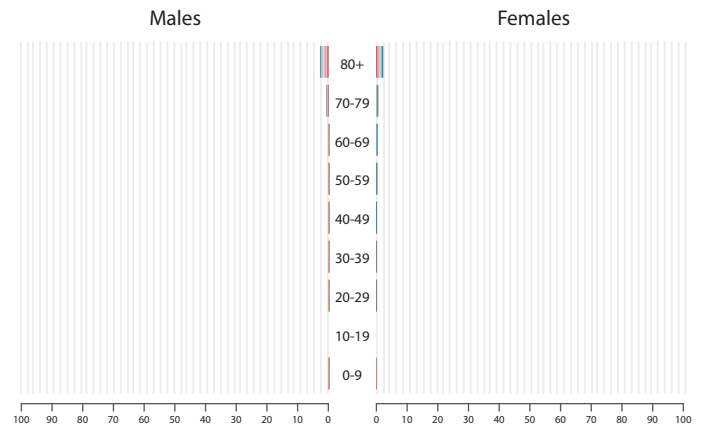

(c) Germany

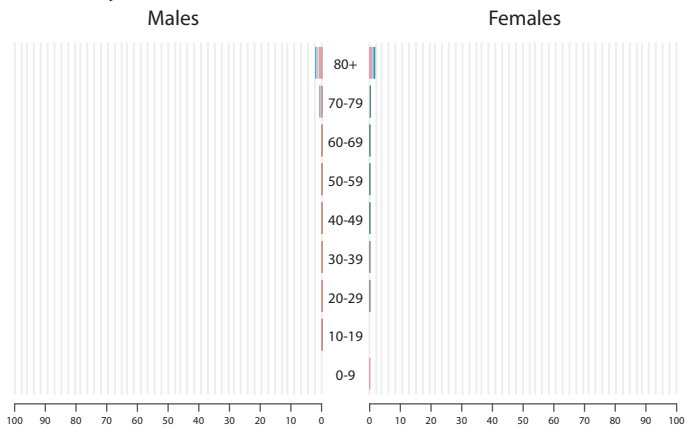

(e) France

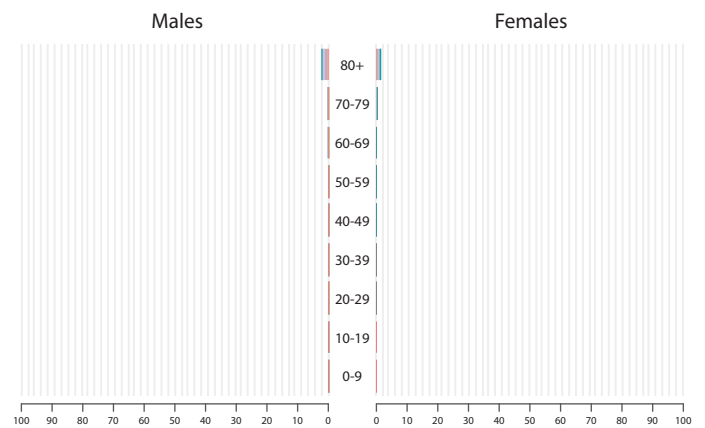

(e) Portugal

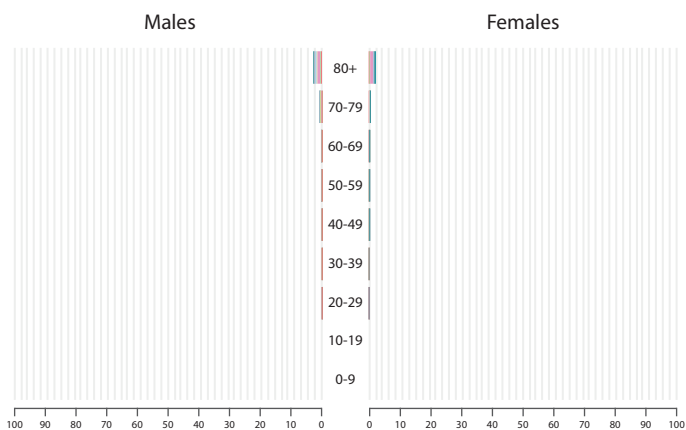

(f) Netherlands

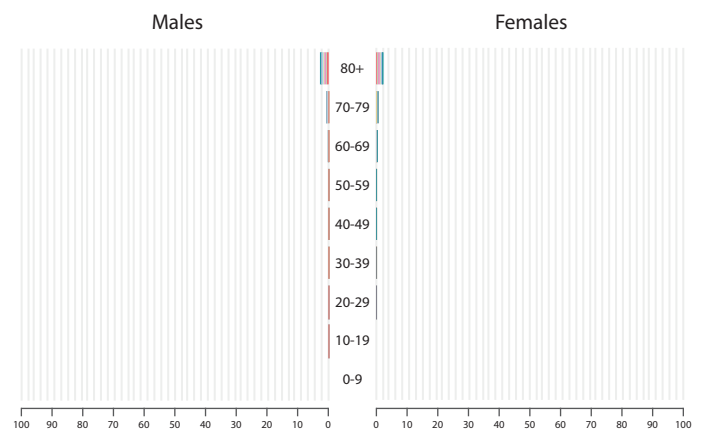

Legend: ● COVID-19 ● Pneumonia ● CVD ● COPD ● Cancer ● RTA ● Dementia

# Supplementary figure 2: Spain

(a) Deaths as a percentage of all cause deaths

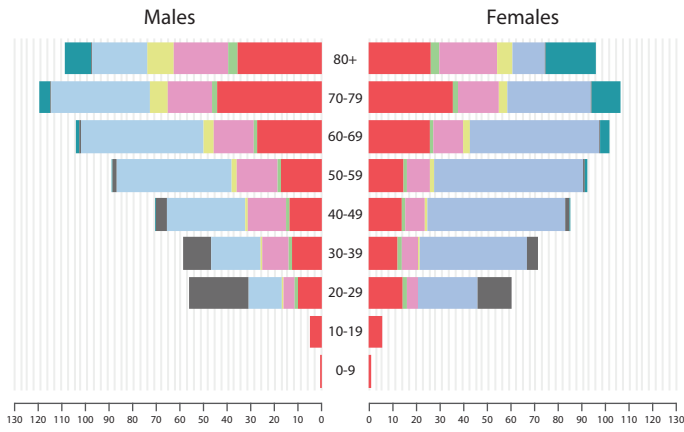

(b) Deaths as a percentage of the population

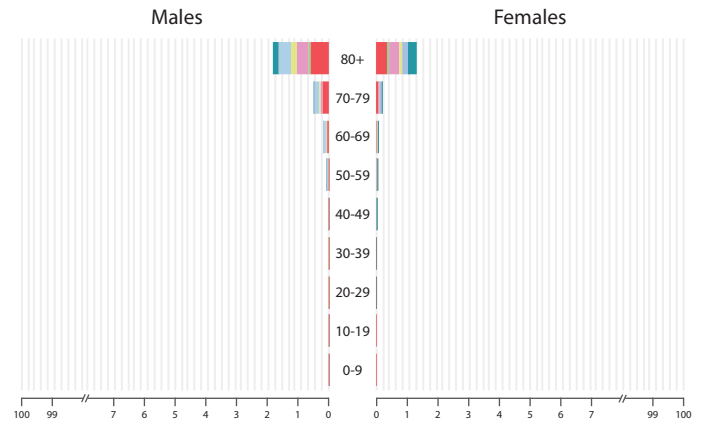

(c) Deaths as a percentage of the population

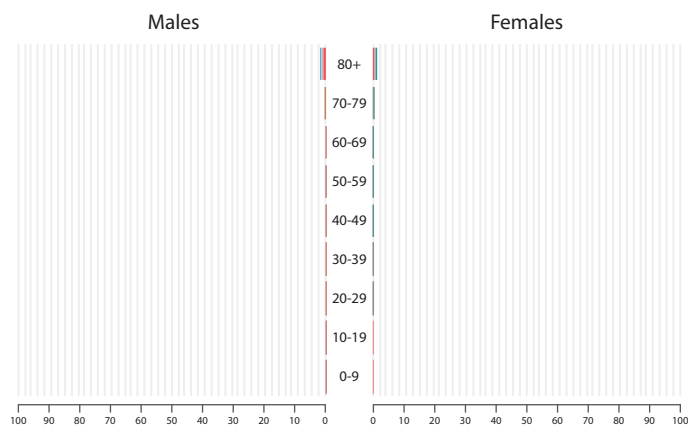

Legend: ● COVID-19 ● Pneumonia ● CVD ● COPD ● Cancer ● RTA ● Dementia
